# Supplementary material
Source: HighWire-hosted journal article supplement (https://injuryprevention.bmj.com/content/suppl/2006/06/01/12.3.148)
Supplement: 123148apps.pdf [file 123148apps.pdf]

## Appendix 1

Risk ratios for death and attributable fractions associated with each study risk factor, compared with not having that risk factor

| Driver, pedestrian, or bicyclist blood alcohol level |         |        |                  |                       |
|------------------------------------------------------|---------|--------|------------------|-----------------------|
| Blood alcohol level (g/dl)                           |         |        |                  | Attributable fraction |
| Blood alcohol level (g/dl)                           | Age (y) | Sex    | Risk ratio       | Attributable fraction |
| 0                                                    | All     | Both   | 1.00 (Reference) | 0                     |
| 0.01                                                 | 0–20    | Female | 1.22             | 0.18                  |
| 0.01                                                 | 0–20    | Male   | 1.42             | 0.30                  |
| 0.01                                                 | ≥21     | Both   | 1.00             | 0                     |
| 0.02–0.04                                            | 0–20    | Female | 1.98             | 0.49                  |
| 0.02–0.04                                            | 0–20    | Male   | 3.44             | 0.71                  |
| 0.02–0.04                                            | 21–34   | Both   | 2.04             | 0.51                  |
| 0.02–0.04                                            | ≥35     | Both   | 2.02             | 0.50                  |
| 0.05–0.07                                            | 0–20    | Female | 3.56             | 0.72                  |
| 0.05–0.07                                            | 0–20    | Male   | 9.94             | 0.90                  |
| 0.05–0.07                                            | 21–34   | Both   | 3.76             | 0.73                  |
| 0.05–0.07                                            | ≥35     | Both   | 3.70             | 0.73                  |
| 0.08–0.09                                            | 0–20    | Female | 5.80             | 0.83                  |
| 0.08–0.09                                            | 0–20    | Male   | 24.03            | 0.96                  |
| 0.08–0.09                                            | 21–34   | Both   | 6.25             | 0.84                  |
| 0.08–0.09                                            | ≥35     | Both   | 6.13             | 0.84                  |
| 0.10–0.14                                            | 0–20    | Female | 11.50            | 0.91                  |
| 0.10–0.14                                            | 0–20    | Male   | 82.73            | 0.99                  |

---

Driver, pedestrian, or bicyclist blood alcohol level

---

| Blood alcohol |         |        |            | Attributable |
|---------------|---------|--------|------------|--------------|
| level (g/dl)  | Age (y) | Sex    | Risk ratio | fraction     |
| 0.10–0.14     | 21–34   | Both   | 12.74      | 0.92         |
| 0.10–0.14     | ≥35     | Both   | 12.41      | 0.92         |
| ≥0.15         | 0–20    | Female | 73.62      | 0.99         |
| ≥0.15         | 0–20    | Male   | 2371.74    | 1.00         |
| ≥0.15         | 21–34   | Both   | 88.13      | 0.99         |
| ≥0.15         | ≥35     | Both   | 84.13      | 0.99         |

Not wearing a seat belt

| Seat belt | Seat position | Age (years) | Air bag present | Risk ratio       | Attributable fraction |
|-----------|---------------|-------------|-----------------|------------------|-----------------------|
| Yes       | All           | All         | Yes or no       | 1.00 (Reference) | 0                     |
| No        | Front         | 0–49        | No              | 2.33             | 0.57                  |
| No        | Front         | 0–49        | Yes             | 2.55             | 0.61                  |
| No        | Front         | ≥50         | No              | 1.90             | 0.47                  |
| No        | Front         | ≥50         | Yes             | 2.08             | 0.52                  |
| No        | Rear          | 0–49        | No              | 1.95             | 0.49                  |
| No        | Rear          | ≥50         | No              | 1.59             | 0.37                  |

Not having a front seat airbag

| Air bag | Seat position | Age (years) | Seat belt | Risk ratio       | Attributable fraction |
|---------|---------------|-------------|-----------|------------------|-----------------------|
| Yes     | All front     | All         | Yes or    | 1.00 (Reference) | 0                     |

---

---

Driver, pedestrian, or bicyclist blood alcohol level

---

| Blood alcohol |           |       |     |            | Attributable |
|---------------|-----------|-------|-----|------------|--------------|
| level (g/dl)  | Age (y)   | Sex   |     | Risk ratio | fraction     |
|               |           |       | No  |            |              |
| No            | Driver    | 5–12  | No  | 0.96       | –0.04        |
| No            | Driver    | 5–12  | Yes | 1.05       | 0.05         |
| No            | Driver    | 13–49 | No  | 1.03       | 0.03         |
| No            | Driver    | 13–49 | Yes | 1.12       | 0.11         |
| No            | Driver    | ≥50   | No  | 1.06       | 0.06         |
| No            | Driver    | ≥50   | Yes | 1.16       | 0.14         |
| No            | Front     | 0–4   | No  | 0.71       | –0.41        |
|               | passenger |       |     |            |              |
| No            | Front     | 0–4   | Yes | 0.78       | –0.28        |
|               | passenger |       |     |            |              |
| No            | Front     | 5–12  | No  | 0.96       | –0.04        |
|               | passenger |       |     |            |              |
| No            | Front     | 5–12  | Yes | 1.05       | 0.05         |
|               | passenger |       |     |            |              |
| No            | Front     | 13–49 | No  | 1.06       | 0.06         |
|               | passenger |       |     |            |              |
| No            | Front     | 13–49 | Yes | 1.16       | 0.14         |
|               | passenger |       |     |            |              |
| No            | Front     | ≥50   | No  | 1.20       | 0.17         |
|               | passenger |       |     |            |              |

---

---

Driver, pedestrian, or bicyclist blood alcohol level

---

| Blood alcohol level (g/dl) |                 |     |     | Risk ratio | Attributable fraction |
|----------------------------|-----------------|-----|-----|------------|-----------------------|
| No                         | Front passenger | ≥50 | Yes | 1.31       | 0.24                  |

No seat belt, or no air bag, or no seat belt and no airbag

| Seat belt | Air bag | Seat position   | Age (years) | Risk ratio       | Attributable fraction |
|-----------|---------|-----------------|-------------|------------------|-----------------------|
| Yes       | Yes     | All             | All         | 1.00 (Reference) | 0                     |
| Yes       | No      | Driver          | 5–12        | 0.96             | –0.04                 |
| Yes       | No      | Driver          | 13–49       | 1.03             | 0.03                  |
| Yes       | No      | Driver          | ≥50         | 1.06             | 0.06                  |
| Yes       | No      | Front passenger | 0–4         | 0.71             | –0.41                 |
| Yes       | No      | Front passenger | 5–12        | 0.96             | –0.04                 |
| Yes       | No      | Front passenger | 13–49       | 1.06             | 0.06                  |
| Yes       | No      | Front passenger | ≥50         | 1.20             | 0.17                  |
| No        | Yes     | Driver          | 0–49        | 2.33             | 0.57                  |
| No        | Yes     | Driver          | ≥50         | 1.90             | 0.47                  |
| No        | Yes     | Front passenger | 0–49        | 2.33             | 0.57                  |

---

---

Driver, pedestrian, or bicyclist blood alcohol level

---

| Blood alcohol level (g/dl) |               |                 |       | Risk ratio       | Attributable fraction |
|----------------------------|---------------|-----------------|-------|------------------|-----------------------|
| No                         | Yes           | Front passenger | ≥50   | 1.90             | 0.47                  |
| No                         | No            | Driver          | 5–12  | 2.45             | 0.59                  |
| No                         | No            | Driver          | 13–49 | 2.62             | 0.62                  |
| No                         | No            | Driver          | ≥50   | 2.21             | 0.55                  |
| No                         | No            | Front passenger | 0–4   | 1.82             | 0.45                  |
| No                         | No            | Front passenger | 5–12  | 2.45             | 0.59                  |
| No                         | No            | Front passenger | 13–49 | 2.69             | 0.63                  |
| No                         | No            | Front passenger | ≥50   | 2.49             | 0.60                  |
| No                         | No            | Rear seat       | 0–49  | 1.95             | 0.49                  |
| No                         | No            | Rear seat       | ≥50   | 1.59             | 0.37                  |
| No motorcycle helmet       |               |                 |       |                  |                       |
| Motorcycle helmet          | Seat position |                 |       |                  |                       |
| Yes                        | All           |                 |       | 1.00 (Reference) | 0                     |
| No                         | Driver        |                 |       | 1.54             | 0.35                  |
| No                         | Rear          |                 |       | 1.72             | 0.42                  |

---

---

Driver, pedestrian, or bicyclist blood alcohol level

---

Blood alcohol Attributable

level (g/dl)      Age (y)      Sex      Risk ratio      fraction

---

No bicycle helmet

Bicycle helmet

Yes      1.00 (Reference)      0

No      2.86      0.65

---

## Appendix 2

Traffic crash deaths attributed to alcohol by age and subgroup, US, 1982–2001

|                   |       | All deaths |       |         | Deaths attributed to anyone's drinking alcohol |              |         | Deaths attributed to drinking alcohol by the dead person |              |         | Deaths attributed to drinking by someone other than the dead person |              |  |
|-------------------|-------|------------|-------|---------|------------------------------------------------|--------------|---------|----------------------------------------------------------|--------------|---------|---------------------------------------------------------------------|--------------|--|
| Subgroup          |       | Count      | Rate  | Count   | Rate                                           | Alcohol (%)† | Count   | Rate                                                     | Alcohol (%)† | Count   | Rate                                                                | Alcohol (%)† |  |
| All               |       | 858,741    | 16.75 | 366,606 | 7.15                                           | 43           | 245,830 | 4.80                                                     | 29           | 144,359 | 2.82                                                                | 17           |  |
| Age group (years) | 0–15  | 67,867     | 5.73  | 14,331  | 1.21                                           | 21           | 1482    | 0.13                                                     | 2            | 13,066  | 1.10                                                                | 19           |  |
|                   | 16–20 | 130,933    | 34.39 | 57,446  | 15.09                                          | 44           | 32,019  | 8.41                                                     | 24           | 28,210  | 7.41                                                                | 22           |  |
|                   | 21–30 | 210,018    | 25.92 | 122,395 | 15.11                                          | 58           | 87,720  | 10.83                                                    | 42           | 42,943  | 5.30                                                                | 20           |  |
|                   | 31–64 | 321,283    | 15.18 | 151,541 | 7.16                                           | 47           | 113,482 | 5.36                                                     | 35           | 49,303  | 2.33                                                                | 15           |  |
|                   | 65+   | 128,640    | 20.30 | 20,893  | 3.30                                           | 16           | 11,127  | 1.76                                                     | 9            | 10,837  | 1.71                                                                | 8            |  |

| Subgroup      | All deaths |         | Deaths attributed to anyone's drinking alcohol |         |              | Deaths attributed to drinking alcohol by the dead person |         |              | Deaths attributed to drinking by someone other than the dead person |        |              |
|---------------|------------|---------|------------------------------------------------|---------|--------------|----------------------------------------------------------|---------|--------------|---------------------------------------------------------------------|--------|--------------|
|               | Count      | Rate    | Count                                          | Rate    | Alcohol (%)† | Count                                                    | Rate    | Alcohol (%)† | Count                                                               | Rate   | Alcohol (%)† |
|               | Persons    | 443,655 | 8.66                                           | 197,642 | 3.86         | 45                                                       | 175,204 | 3.42         | 39                                                                  | 33,350 | 0.65         |
| Drivers       | 213,667    | 4.17    | 79,116                                         | 1.54    | 37           | 0                                                        | 0       | 0            | 79,116                                                              | 1.54   | 37           |
| Passengers    | 121,135    | 2.36    | 53,467                                         | 1.04    | 44           | 42,354                                                   | 0.83    | 35           | 20,893                                                              | 0.41   | 17           |
| Pedestrians   | 63,811     | 1.24    | 31,514                                         | 0.61    | 49           | 25,297                                                   | 0.49    | 40           | 8,393                                                               | 0.16   | 13           |
| Motorcyclists | 16,473     | 0.32    | 4866                                           | 0.09    | 30           | 2975                                                     | 0.06    | 18           | 2,606                                                               | 0.05   | 16           |
| Bicyclists    |            |         |                                                |         |              |                                                          |         |              |                                                                     |        |              |

\*Driver and passenger categories exclude motorcyclists. Deaths, rates, and proportions attributed to drinking by each person and to drinking by another person sum to more than all alcohol deaths, rates, and proportions, because some deaths can be attributed to drinking by more than one person.

†Alcohol (%) =  $100 \times \text{alcohol deaths/all deaths}$ .

Rates per 100,000 person-years.\*

## Appendix 3

Traffic crash deaths attributed to not wearing a seat belt and not having an airbag: US data for vehicle occupants, 1982–2001

| Age<br>(years) | Deaths of<br>vehicle<br>occupants | Deaths attributed to no seat<br>belt |       |      | Deaths of<br>vehicle front<br>occupants | Deaths attributed to no air bag* |        |      |
|----------------|-----------------------------------|--------------------------------------|-------|------|-----------------------------------------|----------------------------------|--------|------|
|                |                                   | Deaths                               |       |      |                                         | Deaths                           |        |      |
|                |                                   | Deaths                               | Rate  | (%)† |                                         | Deaths                           | Rate   | (%)† |
| All            | 641,114                           | 259,239                              | 5.06  | 40   | 564,124                                 | 31,377                           | 0.61   | 6    |
| 0–15           | 37,530                            | 14,443                               | 1.22  | 38   | 18,455                                  | –1337‡                           | –0.11‡ | –7‡  |
| 16–20          | 106,395                           | 48,061                               | 12.62 | 45   | 92,970                                  | 4386                             | 1.15   | 5    |
| 21–30          | 158,393                           | 73,574                               | 9.08  | 46   | 144,439                                 | 6325                             | 0.78   | 4    |
| 31–64          | 239,574                           | 96,330                               | 4.55  | 40   | 216,542                                 | 12,617                           | 0.60   | 6    |
| 65+            | 99,222                            | 26,831                               | 4.23  | 27   | 91,718                                  | 9387                             | 1.48   | 10   |

\*Airbag analysis limited to front occupants in vehicles of the type that customarily have air bags.

†Deaths (%) = attributed deaths/all deaths.

‡Negative attributed deaths are lives saved among the young by not being exposed to air bags, as air bags were a net hazard to young children. Rates per 100,000 person-years.

## Appendix 4

Traffic crash deaths attributed to not wearing a helmet among motorcycle riders and bicyclists by age: US data, 1982–2001

| Age<br>(years) | Deaths of<br>motorcycle<br>riders | Deaths attributed to no<br>motorcycle helmet |      |             | Deaths of<br>bicyclists | Deaths attributed to no bicycle<br>helmet |      |             |
|----------------|-----------------------------------|----------------------------------------------|------|-------------|-------------------------|-------------------------------------------|------|-------------|
|                |                                   | Deaths                                       |      | Deaths (%)* |                         | Deaths                                    |      | Deaths (%)* |
|                |                                   | Deaths                                       | Rate |             |                         | Deaths                                    | Rate |             |
| All            | 63,811                            | 12,095                                       | 0.24 | 19          | 16,473                  | 10,552                                    | 0.21 | 64          |
| 0–15           | 1,896                             | 434                                          | 0.04 | 23          | 6523                    | 4210                                      | 0.36 | 65          |
| 16–20          | 11,016                            | 2225                                         | 0.58 | 20          | 1744                    | 1125                                      | 0.30 | 65          |
| 21–30          | 26,356                            | 5040                                         | 0.62 | 19          | 2264                    | 1455                                      | 0.18 | 64          |
| 31–64          | 23,608                            | 4258                                         | 0.20 | 18          | 4817                    | 3045                                      | 0.14 | 63          |
| 65+            | 935                               | 138                                          | 0.02 | 15          | 1125                    | 717                                       | 0.11 | 64          |

\*Deaths (%) = Attributed deaths/all deaths.  
Rates per 100,000 person-years.
